# Supplementary material for: Competing effect of activity and non-inert crowding on the dynamics of self-propelled tracer particles
Source: Research Square preprint supplement (doi:10.21203/rs.3.rs-7138866/v1), 2025-07-25
Supplement: Supplementary file 1 [file a57e462a995bac0297c16532.pdf]

# Supplementary information: Competing effect of activity and non-inert crowding on the dynamics of self-propelled tracer particles

Baburao Simma<sup>1</sup>, Vrinda Garg<sup>1</sup>, Radha Ramana<sup>1</sup>, and Surya K. Ghosh<sup>1, \*</sup>

<sup>1</sup>Department of Physics, National Institute of Technology, Warangal,  
506004, India

\*skghosh@nitw.ac.in

July 16, 2025

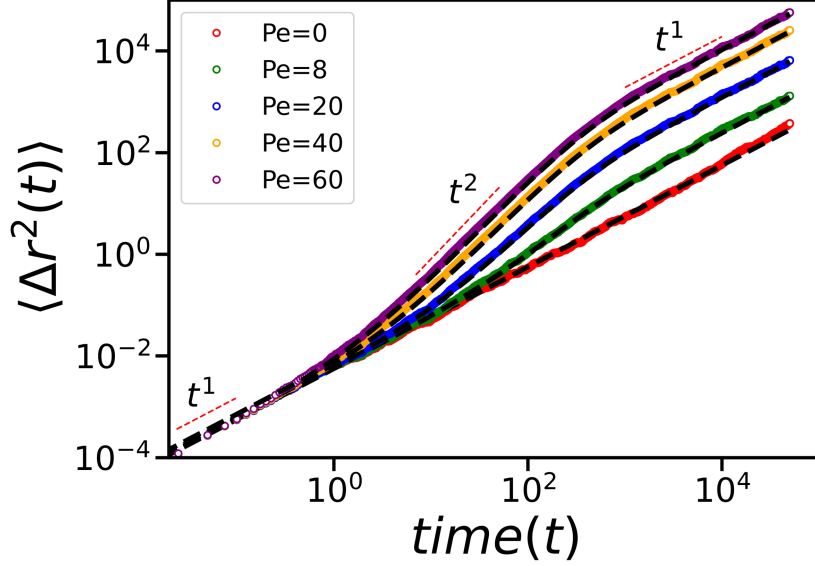

Figure S1: Ornstein-Uhlenbeck solution for self-propelled particles (dotted lines) shows an excellent agreement with the MSD obtained from our simulation (solid lines) for self-propelled particle in free space across various Peclet number (Pe) values.

For validation of our model of a self-propelled particle (SPP), we first simulate an SPP in free space. Then, we calculate the mean squared displacement (MSD) of the particle for various propulsion strengths (Pe). In free space, the analytical expression for the active Ornstein-Uhlenbeck (OU) process is

$$\langle \Delta r^2(t) \rangle = 6D_t t + \frac{2F_a^2 t_R}{\gamma^2} [t + t_R (e^{-\frac{t}{t_R}} - 1)] \quad (1)$$

For a passive particle in free space (i.e., with  $Pe=0$ ), the MSD is always diffusive  $\Delta r^2(t) = t^1$ . For the self-propelled tracer particle, the MSD shows a three-step variation. At the shorter time scale, the MSD shows diffusive behaviour ( $t^1$ ); at the intermediate time scale, it is superdiffusive ( $t^2$ ) and finally, at the longer time scale, it becomes diffusive again ( $t^1$ ).

To verify our simulation, in Fig. S1, we reproduced the solution of the Ornstein-Uhlenbeck (OU) process. Our simulation data perfectly match the analytical expression of OU solution for self-propelled particles for different Pe [Fig. S1].

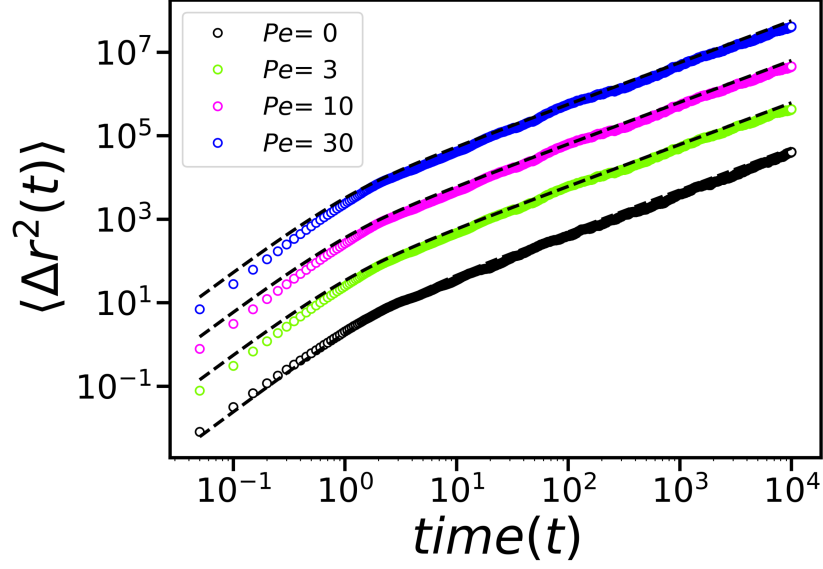

Figure S2: Ornstein-Uhlenbeck solution for self-propelled particles (dotted lines) shows an excellent agreement with the MSD obtained from our simulation (solid lines) for self-propelled particle in free space across various Peclet number (Pe) values in the Under damp limit.

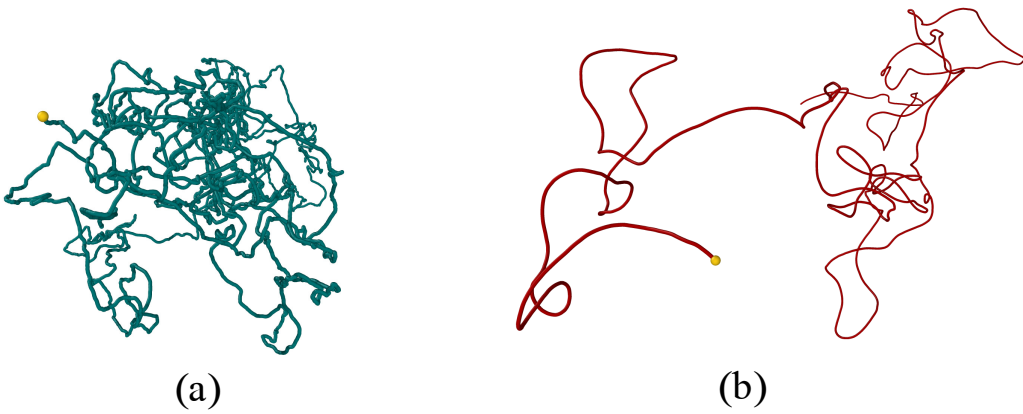

Figure S3: Trajectories of (a) Passive brownian particle and (b) Self-propelled particle in a free space.

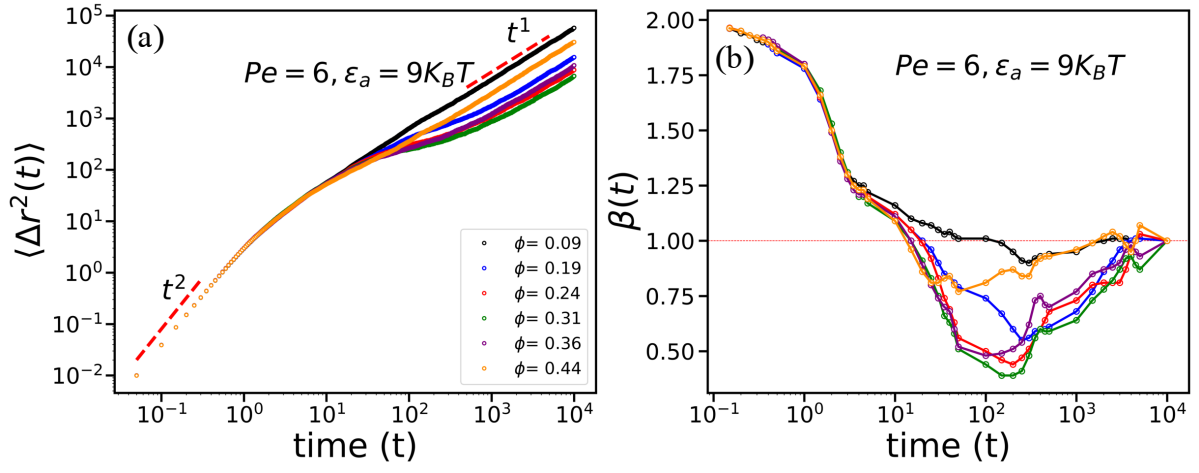

Figure S4: Plot shows the Mean Squared displacement of Self-propelled tracer ( $Pe = 6$ ) at attraction strength ( $\varepsilon_a = 9K_B T$ ) and the corresponding logarithmic exponent.

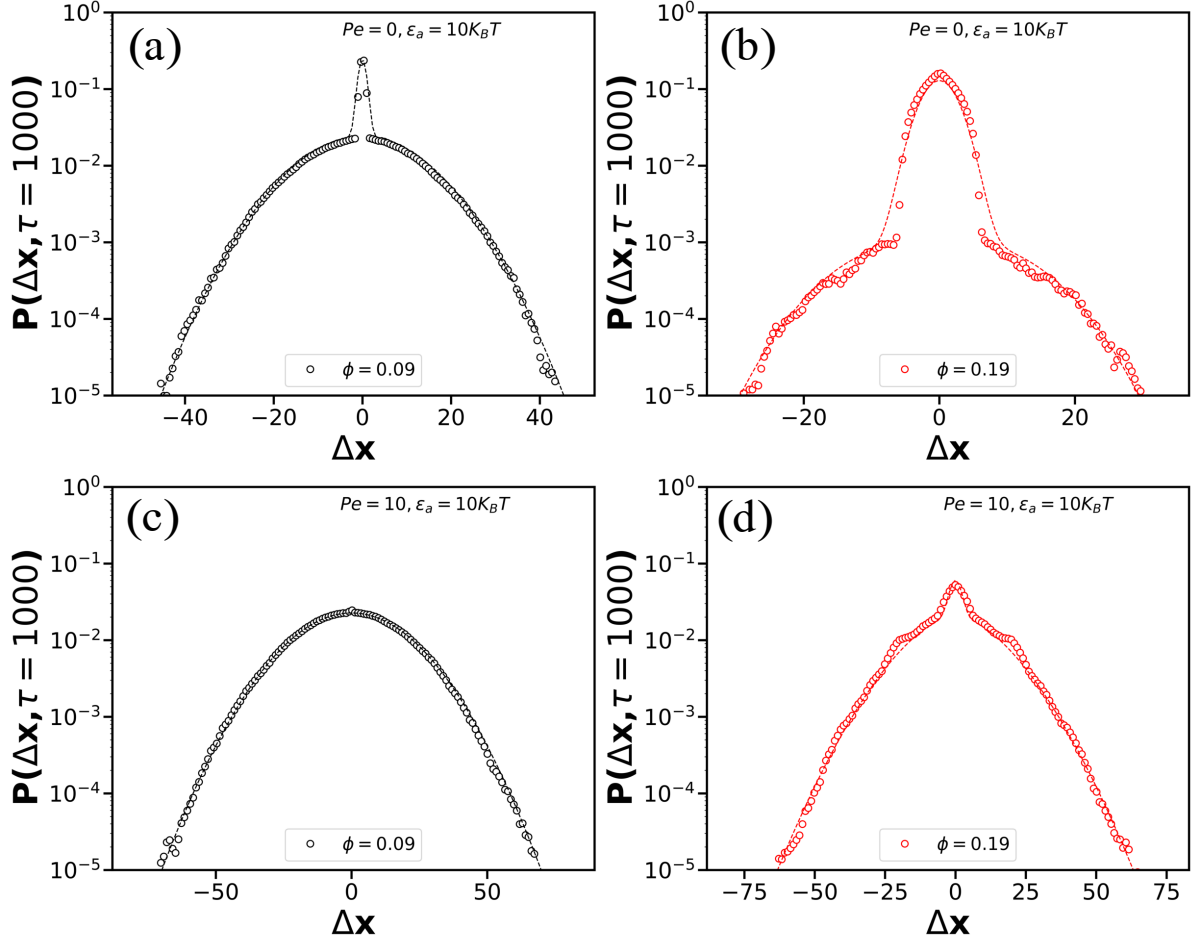

Figure S5: Plot shows the double non-gaussian fitting with the the analytical expression. (a) Shows the fitting of both stiffer and broader gaussian occur at  $\phi = 0.09$ ,  $\epsilon_a = 10K_B T$ , (b) Shows fitting of slightly broader inner non-gaussian profile as well as outer non-gaussian profile. (c) For  $Pe = 10$  the profile becomes gaussian even there is significant attraction strength and minimal packing fraction. (d) For intermediate value of packing fraction ( $\phi = 0.19$ ), the resultant ripple profile fit with proper analytical expression.

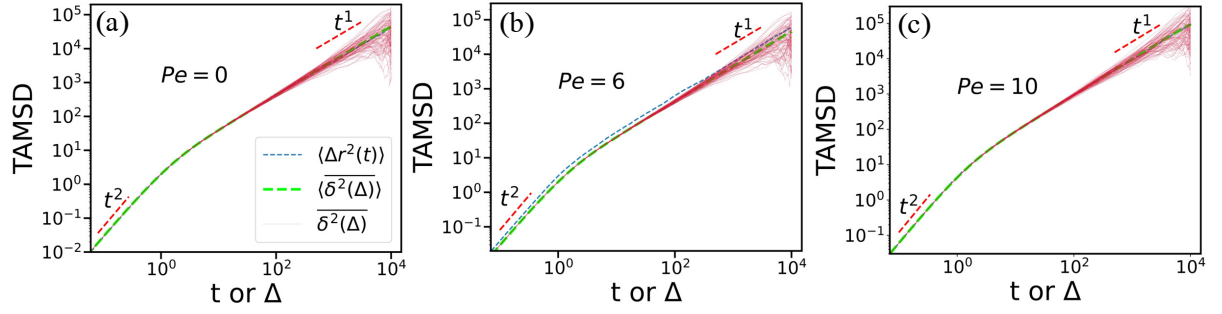

Figure S6: Plot shows the Time averaged MSD of each trajectory, Ensemble average of TAMSD and the Ensemble averaged MSD of (a) Passive ( $Pe=0$ ) (b) SPP ( $Pe=6$ ) and (c) SPP ( $Pe=10$ ) for model parameters  $\phi = 0.09$ ,  $\varepsilon_a = 2K_B T$ . The three properties plot on same panel to show the comparison.
